# Supplementary material for: Impact of heat stress on foliar biogenic volatile organic compound emission and gene expression in tomato (Solanum lycopersicum) seedlings
Source: Oxford University Press journal article supplement (doi:10.1525/elementa.2021.00096), 2022-01-01
Supplement: data_file_s1-tomato_voc_emission_rates.xlsx [file data_file_s1-tomato_voc_emission_rates.xlsx]

## Sheet: Tami-G 1
		Enclosure					Emission rate (pmol m-2 s-1) - measured via GC-MS
Chromatogram filename	Plant ID	temperature (°C)	Light/dark	Sampling date	Sampling time (PDT)		a-Pinene	Camphene	b-Myrcene	b-Pinene	a-Phellandrene	a-Terpinene	trans-Ocimene	Limonene	o-Cymene	b-Phellandrene	g-Terpinene	Terpinolene	a-Copaene	b-Caryophyllene	a-Humulene	MT 18.69	p-Menthatriene	2-Carene	Isoterpinolene	MT 21.75	SQT 27.57	Hexenol	SQT 28.12	SQT 28.34	SQT 28.50	TMTT	SQT 29.08	SQT 29.46	MeSA	d-Elemene	b-Elemene
TERN_20200720Tomato30C1 3secs.dbc.h5	Tami-G 1	30	Light	2020-07-20	15:47:00		1.77	0	0	0	6.68	0	0	3.62	0.683	25.3	0	0	0	0	0	0	2.71	10.9	0	0	0	0	0	0	0	16.6	0	0	0	0	0
TERN_20200720Tomato30C4 3secs.dbc.h5	Tami-G 1	30	Light	2020-07-20	18:58:00		0.712	0	0	0	2.13	0	0	1.92	0.155	15.3	0	0	0	0	0	0	1.45	5.78	0	0	0	0	0	0	0	35.8	0	0	0	0	0
TERN_20200721Tomato30C1 3secs.dbc.h5	Tami-G 1	30	Dark	2020-07-20	22:45:00		2.94	0	0	0	9.52	0	0	4.45	3.36	13.6	0	0	0	0	0	0	3.71	15.8	0	0	0	0	0	0	0	0	0	0	0	0	0
TERN_20200721Tomato30C10 3secs.dbc.h5	Tami-G 1	30	Light	2020-07-21	19:33:00		0.622	0	0	0	2.34	0	0	2.48	0.363	10.2	0	0	11	0	0	0	1.99	6.22	0	0	0	0	0	0	0	527	0	0	0	0	0
TERN_20200721Tomato30C4 3secs.dbc.h5	Tami-G 1	30	Light	2020-07-21	12:03:00		0.276	0	0	0	4.43	0	0	1.86	0.523	4.55	0	0	2.65	0	0	0	1.42	4.02	0	0	0	0	0	0	0	65.5	7.55	0	0	0	0
TERN_20200721Tomato30C7 3secs.dbc.h5	Tami-G 1	30	Light	2020-07-21	15:58:00		0.226	0	0	0	4.27	0	0	1.95	0.467	6.2	0	0	7.63	0	0	0	1.45	4.8	0	0	0	0	0	0	0	119	0	0	0	0	0
TERN_20200722Tomato30C1 3secs.dbc.h5	Tami-G 1	30	Dark	2020-07-21	22:55:00		1.28	0	0	0	3.36	0	0	1.51	1.45	1.3	0	0	0	0	0	0	1.41	5.83	0	0	0	0	0	0	0	0	0	0	0	0	0
TERN_20200722Tomato30C4 3secs.dbc.h5	Tami-G 1	30	Light	2020-07-22	11:51:00		0	0	0	0	0	0	0	0.947	1.05	0	0	0	0	0	0	0	1.01	1.08	0	0	0	0	0	0	0	2.17	0	0	0	0	0
TERN_20200722Tomato42C1 3secs.dbc.h5	Tami-G 1	42	Light	2020-07-22	15:26:00		3.05	0.23	1.84	0	53	4.43	0	12	10.6	24.4	0.183	0.336	0	0	0	0	8.76	28.9	0	0	0	0	0	0	0	0	0	0	0	0	0
TERN_20200722Tomato42C4 3secs.dbc.h5	Tami-G 1	42	Light	2020-07-22	18:19:00		2.02	0	0	0	17.8	0	0	7.46	6.79	16.8	0	0	0	0	0	0	4.61	10	0	0	0	0	0	0	0	12.4	7.76	0	0	0	0
TERN_20200723Tomato42C3 3secs.dbc.h5	Tami-G 1	42	Dark	2020-07-22	23:09:00		15.7	0	15.5	1.03	175	12	0	66.5	10.8	385	0.383	1.46	0	0	0	0	42.5	138	0	0	0	0	0	0	0	27.5	0	0	0	0	0
TERN_20200723Tomato42C6 3secs.dbc.h5	Tami-G 1	42	Light	2020-07-23	12:17:00		172	27.6	94.6	3.54	2070	1520	0	617	1470	719	56.1	44.6	0	0	2.21	16.4	237	1600	103	3.04	0	0	0	0	0	0	0	0	0	0	0

## Sheet: Tami-G 2
		Enclosure					Emission rate (pmol m-2 s-1) - measured via GC-MS
Chromatogram filename	Plant ID	temperature (°C)	Light/dark	Sampling date	Sampling time (PDT)		a-Pinene	Camphene	b-Myrcene	b-Pinene	a-Phellandrene	a-Terpinene	trans-Ocimene	Limonene	o-Cymene	b-Phellandrene	g-Terpinene	Terpinolene	a-Copaene	b-Caryophyllene	a-Humulene	MT 18.69	p-Menthatriene	2-Carene	Isoterpinolene	MT 21.75	SQT 27.57	Hexenol	SQT 28.12	SQT 28.34	SQT 28.50	TMTT	SQT 29.08	SQT 29.46	MeSA	d-Elemene	b-Elemene
TERN_20200720Tomato30C2 3secs.dbc.h5	Tami-G 2	30	Light	2020-07-20	15:47:00		2.02	0.175	0	0.241	0	0	0	0	0.274	0	0	0	0	0	0.277	0	0	0	0	0	0	0	0	0	0	9.59	0	0	0	0	0
TERN_20200720Tomato30C5 3secs.dbc.h5	Tami-G 2	30	Light	2020-07-20	18:58:00		0.703	0	0	0	0	0	0	0	0.0431	0	0	0	0	0	0	0	0	0	0	0	0	0	0	0	0	10.7	0	0	0	0	0
TERN_20200721Tomato30C11 3secs.dbc.h5	Tami-G 2	30	Light	2020-07-21	19:33:00		0.249	0	0	0	0	0	0	0	0	0	0	0	0	0	0	0	0	0	0	0	0	0	0	0	0	0	0	0	0	0	0
TERN_20200721Tomato30C2 3secs.dbc.h5	Tami-G 2	30	Dark	2020-07-20	22:45:00		0	0	0	0	0	0	0	0.171	0.0808	0	0.0645	0	0	0	0	0	0	0	0	0	0	0	0	0	0	0	0	0	0	0	0
TERN_20200721Tomato30C5 3secs.dbc.h5	Tami-G 2	30	Light	2020-07-21	12:03:00		0.611	0.0986	0	0	0	0	0	0.238	0.142	0	0	0	0	0	0	0	0	0	0	0	0	0	0	0	0	3.61	0	0	0	0	0
TERN_20200721Tomato30C8 3secs.dbc.h5	Tami-G 2	30	Light	2020-07-21	15:58:00		0.287	0	0	0	0	0	0	0	0.119	0	0	0	0	0	0	0	0	0	0	0	0	0	0	0	0	68	0	0	0	0	0
TERN_20200722Tomato30C2 3secs.dbc.h5	Tami-G 2	30	Dark	2020-07-21	22:55:00		0	0	0	0	0	0	0	0	0	0	0	0	0	0	0	0	0	0	0	0	0	0	0	0	0	14	0	0	0	0	0
TERN_20200722Tomato30C5 3secs.dbc.h5	Tami-G 2	30	Light	2020-07-22	11:51:00		0.0491	0	0	0	0	0	0	0	0.0933	0	0	0	0	0	0	0	0	0	0	0	0	0	0	0	0	316	0	0	0	0	0
TERN_20200722Tomato42C2 3secs.dbc.h5	Tami-G 2	42	Light	2020-07-22	15:26:00		1.74	0	0.412	0.332	1.43	0	0	0	0.323	0	0	0	0	0.811	0.157	0	0	0	0	0	0	0	0	0	0	39.2	0	0	0	0	0
TERN_20200723Tomato42C1 3secs.dbc.h5	Tami-G 2	42	Light	2020-07-22	18:19:00		1.33	0	0	0.344	1.63	0	0	0.574	0.363	0	0	0	0	4.32	1.35	0	0	0.396	0	0	0	9.56	0	0	0	58.3	0	0	0	0	0
TERN_20200723Tomato42C4 3secs.dbc.h5	Tami-G 2	42	Dark	2020-07-22	23:09:00		0.52	0	0	0	0	0	0	0	0.0633	0.0791	0	0	0	0	0	0	0	0	0	0	0	0	0	0	0	0	0	0	0	0	0
TERN_20200723Tomato42C7 3secs.dbc.h5	Tami-G 2	42	Light	2020-07-23	12:17:00		73.4	4.25	0	10.6	2.26	0	0	4.42	0.773	2.11	0.312	0.119	0	17.6	6.33	0	0	0.539	0	0	1.78	0	0	0	0	0	0	0	0	0	0

## Sheet: Tami-G 3
		Enclosure					Emission rate (pmol m-2 s-1) - measured via GC-MS
Chromatogram filename	Plant ID	temperature (°C)	Light/dark	Sampling date	Sampling time (PDT)		a-Pinene	Camphene	b-Myrcene	b-Pinene	a-Phellandrene	a-Terpinene	trans-Ocimene	Limonene	o-Cymene	b-Phellandrene	g-Terpinene	Terpinolene	a-Copaene	b-Caryophyllene	a-Humulene	MT 18.69	p-Menthatriene	2-Carene	Isoterpinolene	MT 21.75	SQT 27.57	Hexenol	SQT 28.12	SQT 28.34	SQT 28.50	TMTT	SQT 29.08	SQT 29.46	MeSA	d-Elemene	b-Elemene
TERN_20200720Tomato30C3 3secs.dbc.h5	Tami-G 3	30	Light	2020-07-20	15:47:00		4.66	0.577	0	0.283	0	0	0	0.483	0.154	0	0	0	0	0	0	0	0	0	0	0	0	0	0	0	0	0	0	0	0	0	0
TERN_20200720Tomato30C6 3secs.dbc.h5	Tami-G 3	30	Light	2020-07-20	18:58:00		4.98	0.567	0	0.354	0	0	0	0.373	0.121	0	0	0	0	0	0.262	0	0	0	0	0	0	0	0	0	0	5.99	0	0	0	0	0
TERN_20200721Tomato30C12 3secs.dbc.h5	Tami-G 3	30	Light	2020-07-21	19:33:00		5.61	0.457	0	0.596	0	0	0	0.455	0.216	0	0	0	4.83	0	0	0	0	0	0	0	0	0	0	0	0	87.6	0	0	0	0	0
TERN_20200721Tomato30C3 3secs.dbc.h5	Tami-G 3	30	Dark	2020-07-20	22:45:00		7.34	1.57	0	0.12	0	0	0	0.498	0.0863	0	0	0	0	0	0	0	0	0	0	0	0	0	0	0	0	2.35	0	0	0	0	0
TERN_20200721Tomato30C6 3secs.dbc.h5	Tami-G 3	30	Light	2020-07-21	12:03:00		3.93	0.321	0	0.434	0	0	0	0.341	0.17	0	0	0	5.16	0	0	0	0	0	0	0	0	0	0	0	0	30.7	6.4	0	0	0	0
TERN_20200721Tomato30C9 3secs.dbc.h5	Tami-G 3	30	Light	2020-07-21	15:58:00		4.6	0.299	0	0.531	0	0	0	0.327	0.136	0	0	0	2.3	0	0	0	0	0	0	0	0	0	0	0	0	20.9	2.7	0	0	0	0
TERN_20200722Tomato30C3 3secs.dbc.h5	Tami-G 3	30	Dark	2020-07-21	22:55:00		11.5	0.642	0	1.41	0	0	0	0.35	0.0429	0	0	0	0	0	0	0	0	0	0	0	0	0	0	0	0	23.8	0	0	0	0	0
TERN_20200722Tomato30C6 3secs.dbc.h5	Tami-G 3	30	Light	2020-07-22	11:51:00		27.3	1.23	0	4.56	0.388	0	0	1.53	0.26	0.598	0.206	0	1.23	0	0	0	0	0	0	0	0	0	0	0	0	52.1	0	0	0	0	0
TERN_20200722Tomato42C3 3secs.dbc.h5	Tami-G 3	42	Light	2020-07-22	15:26:00		14.1	0.662	0	3.26	1.25	0	0	1.13	0.446	0.28	0.0461	0	0	1.39	0.478	0	0	0	0	0	0	0	0	0	0	16.5	0	0	0	0	0
TERN_20200723Tomato42C2 3secs.dbc.h5	Tami-G 3	42	Light	2020-07-22	18:19:00		52	5.16	0	8.88	1.69	0.266	0	5	1.77	0.887	0.922	1.13	0	0	0	0	0	0	0	0	0	0	0	0	0	2.77	0	0	0	0	0
TERN_20200723Tomato42C5 3secs.dbc.h5	Tami-G 3	42	Dark	2020-07-22	23:09:00		165	15.2	0	13.6	4.22	0.765	0	11.7	1.84	3.72	1.94	1.99	0	0	0	0	0	0	0	0	0	0	0	0	0	0	0	0	0	0	0
TERN_20200723Tomato42C8 3secs.dbc.h5	Tami-G 3	42	Light	2020-07-23	12:17:00		68.9	2.59	0	15.9	1.73	0.239	0	4.74	0.618	3.54	1.05	0.521	4.64	17.6	4.46	0	0	0	0	0	0	0	0	0	0	0	0	0	0	0	0

## Sheet: Beefsteak 1
		Enclosure					Emission rate (pmol m-2 s-1) - measured via GC-MS
Chromatogram filename	Plant ID	temperature (°C)	Light/dark	Sampling date	Sampling time (PDT)		a-Pinene	Camphene	b-Myrcene	b-Pinene	a-Phellandrene	a-Terpinene	trans-Ocimene	Limonene	o-Cymene	b-Phellandrene	g-Terpinene	Terpinolene	a-Copaene	b-Caryophyllene	a-Humulene	MT 18.69	p-Menthatriene	2-Carene	Isoterpinolene	MT 21.75	SQT 27.57	Hexenol	SQT 28.12	SQT 28.34	SQT 28.50	TMTT	SQT 29.08	SQT 29.46	MeSA	d-Elemene	b-Elemene
TERN_20200727Beefsteak130C1 3secs.dbc.h5	Beefsteak 1	30	Light	2020-07-27	16:10:00		6.72	0.54	2.18	0.0965	64.2	8.75	0	13.8	6.66	67.2	0.291	0	0	3.54	1.03	0	2.56	55.9	0	0	0.562	0	0	0	0	0.7	0	0	0	0	0
TERN_20200727Beefsteak130C2 3secs.dbc.h5	Beefsteak 1	30	Light	2020-07-27	18:10:00		3.25	0	1.32	0.166	8.17	0.6	0	6.19	0.785	55.1	0	0	0	0	0.319	0	1.15	26	0	0	0	0	0	0	0	5.03	0	0	0	0	0
TERN_20200728Beefsteak130C1 3secs.dbc.h5	Beefsteak 1	30	Light	2020-07-27	19:51:00		1.67	0	0.752	0	13.3	0.743	0	3.52	1.76	13.3	0	0	0	0	0	0	0.624	11.7	0	0	0	0	0	0	0	0	0	0	0	0	0
TERN_20200728Beefsteak130C2 3secs.dbc.h5	Beefsteak 1	30	Dark	2020-07-27	23:33:00		0.0794	0.412	0	0	0	0	0	0.786	2.02	0	0	0	0	0	0	0	0.274	0.888	0	0	0	0	0	0	0	0	0	0	0	0	0
TERN_20200728Beefsteak130C3 3secs.dbc.h5	Beefsteak 1	30	Light	2020-07-28	11:43:00		2.21	0.253	1.53	0	27	2.18	0	5.89	3.87	14.8	0	0	60.3	0	0.201	0	1.05	17.7	0	0	0	0	7.83	10	9.47	18.5	11.1	0	0	0	0
TERN_20200728Beefsteak142C1 3secs.dbc.h5	Beefsteak 1	42	Light	2020-07-28	15:05:00		3.48	0.109	3.02	0	25.3	2.12	0	11.9	16.7	30	0	0	46.7	0	0	0	1.65	9.43	0	0	0	0	5.98	18.4	18.2	92.9	27.2	7.11	12.1	0	0
TERN_20200728Beefsteak142C2 3secs.dbc.h5	Beefsteak 1	42	Light	2020-07-28	17:50:00		3.29	0	3.22	0.275	41.2	5.06	0	11.8	3.98	49	0.15	0.17	40.9	0.923	0.154	0	1.97	26.1	0	0	0	0	6.11	18.2	12.5	189	19.3	11.6	87.8	0	0
TERN_20200729Beefsteak130C1 3secs.dbc.h5	Beefsteak 1	30	Light	2020-07-29	12:53:00		15.8	0.384	3.58	0.538	232	26.7	0	44.8	9.23	281	0.582	1.6	14.5	3.5	1.49	0	4.28	165	0.466	0	0	10.6	0	8.49	0	105	10.3	22.1	0	0	0
TERN_20200729Beefsteak142C1 3secs.dbc.h5	Beefsteak 1	42	Light	2020-07-28	19:38:00		2.49	0	2.85	0.115	33.7	4.84	0	10.7	3.81	38.2	0	0	38.7	0	0	0	1.64	17.5	0	0	0	0	3.41	17.7	12.3	181	21.8	3.88	120	0	0
TERN_20200729Beefsteak142C2 3secs.dbc.h5	Beefsteak 1	42	Dark	2020-07-29	01:10:00		1.97	0	1.44	0	20.7	0.845	0	9.24	5.38	35.7	0	0	0	0	0	0	1.48	19.1	0	0	0	0	0	0	0	1.89	0	0	0	0	0
TERN_20200729Beefsteak142C3 3secs.dbc.h5	Beefsteak 1	42	Light	2020-07-29	09:55:00		4.37	0	4.07	0.196	24	3.99	0	23.7	0.897	167	0.18	0.865	16.7	0	0	0	2.75	44.1	0	0	0	22	0	0	0	516	0	0	0	0	0
TERN_20200729Beefsteak142C4 3secs.dbc.h5	Beefsteak 1	42	Light	2020-07-29	12:07:00		3.59	0.739	4.31	0	87.5	29.4	0	27.7	25.7	35.4	0.98	1.39	9.49	0	0.235	0.133	3.4	33.2	1.15	0	0	25.6	4.87	13.5	13.5	32.7	16.3	0	0	0	0
TERN_20200731Beefsteak130C1 3secs.dbc.h5	Beefsteak 1	30	Light	2020-07-29	17:01:00		2.77	0	2.57	0.264	10.6	0.788	1.25	9.94	0.739	182	0	0	83.7	3.38	11.3	0	0.986	24.1	0	0	0	11.2	0	0	0	1030	0	0	2500	0	0
TERN_20200731Beefsteak130C2 3secs.dbc.h5	Beefsteak 1	30	Light	2020-07-29	19:46:00		1.53	0	1.05	0	17.1	3.45	0	5.16	3.38	9.91	0	0	54.7	0	0	0	0.598	13.5	0	0	0.198	0	11.5	21.3	27	37.1	37.7	0	0	0	0
TERN_20200731Beefsteak130C3 3secs.dbc.h5	Beefsteak 1	30	Light	2020-07-30	18:39:00		0.944	0	0.83	0	11	0.19	0	2.97	0.882	11.5	0	0	75.9	0	0.112	0	0.39	8.41	0	0	0	0	2.45	5.51	0	22.5	8.18	0	0	0	0

## Sheet: Cherokee 1
		Enclosure					Emission rate (pmol m-2 s-1) - measured via GC-MS
Chromatogram filename	Plant ID	temperature (°C)	Light/dark	Sampling date	Sampling time (PDT)		a-Pinene	Camphene	b-Myrcene	b-Pinene	a-Phellandrene	a-Terpinene	trans-Ocimene	Limonene	o-Cymene	b-Phellandrene	g-Terpinene	Terpinolene	a-Copaene	b-Caryophyllene	a-Humulene	MT 18.69	p-Menthatriene	2-Carene	Isoterpinolene	MT 21.75	SQT 27.57	Hexenol	SQT 28.12	SQT 28.34	SQT 28.50	TMTT	SQT 29.08	SQT 29.46	MeSA	d-Elemene	b-Elemene
TERN_20200727Cherokee30C1 3secs.dbc.h5	Cherokee 1	30	Light	2020-07-27	16:10:00		1.23	0.306	0.984	0	11.4	1.98	0	3.82	4.7	5.99	0	0	0	0	0.348	0	3.39	7.73	0	0	0.176	0	0	0	0	0	0	0	0	0	0
TERN_20200727Cherokee30C2 3secs.dbc.h5	Cherokee 1	30	Light	2020-07-27	18:10:00		0.525	0	0	0	4.25	0.329	0	1.57	0.917	3.36	0	0	0	0	0	0	1.15	2.9	0	0	0	0	0	0	0	0	0	0	0	0	0
TERN_20200727Cherokee30C3 3secs.dbc.h5	Cherokee 1	30	Light	2020-07-27	19:51:00		0.606	0	0	0	1.83	0	0	1.69	0.209	13.5	0	0	0	0	0	0	1.64	4.4	0	0	0	0	0	0	0	46.1	0	0	0	0	0
TERN_20200728Cherokee30C1 3secs.dbc.h5	Cherokee 1	30	Dark	2020-07-27	23:33:00		0.0847	0	0	0	0.896	0	0	0.307	0.235	0.435	0	0	0	0	0	0	0.389	0.76	0	0	0	0	0	1.12	0	4.63	0.781	0	0	0	0
TERN_20200728Cherokee30C2 3secs.dbc.h5	Cherokee 1	30	Light	2020-07-28	11:43:00		0.355	0	0.633	0	3.28	0.427	0	1.04	0.359	2.31	0	0	52.2	0	0.811	0	0.734	1.81	0	0	2.4	0	40.5	140	125	230	259	155	53.2	0	0
TERN_20200728Cherokee42C1 3secs.dbc.h5	Cherokee 1	42	Light	2020-07-28	15:05:00		0.816	0	1.63	0	14.3	3.63	0.305	3.29	1.51	6.67	0	0.103	23.8	0	0.239	0	2.52	4.82	0	0	3.14	0	32	44.9	117	435	95.6	4.5	22.9	0	0
TERN_20200728Cherokee42C2 3secs.dbc.h5	Cherokee 1	42	Light	2020-07-28	17:50:00		0.579	0	0.699	0	3.74	0	0	2.17	0.309	11.9	0	0	42.4	2.52	0	0	1.75	3.38	0	0	0	0	0	0	0	1600	0	0	646	0	0
TERN_20200729Cherokee30C1 3secs.dbc.h5	Cherokee 1	30	Light	2020-07-29	12:53:00		3.56	0.245	0.548	0	30.3	1.91	0	8.25	9.43	28.5	0	0	0	0	0	0	5.97	21.1	0	0	0	0	0	1.61	0	6.76	4.03	0	0	0	0
TERN_20200729Cherokee42C1 3secs.dbc.h5	Cherokee 1	42	Light	2020-07-28	19:38:00		0.742	0	0.393	0	5.82	0.157	0	2.11	0.905	4.49	0	0	25.5	0	0.123	0	1.7	1.89	0	0	0	0	12.6	35.3	26.9	376	43.4	29.3	128	0	0
TERN_20200729Cherokee42C2 3secs.dbc.h5	Cherokee 1	42	Dark	2020-07-29	01:10:00		0.168	0	0	0	2.97	0.424	0	1.37	1.18	1.14	0	0	0	0	0	0	1.02	0.816	0	0	0	0	0	0	0	5.75	2.71	0	0	0	0
TERN_20200729Cherokee42C3 3secs.dbc.h5	Cherokee 1	42	Light	2020-07-29	09:55:00		0.499	0	0.563	0	10.3	1.32	0	3.06	1.41	6.75	0	0.0891	1.75	0	0	0	2.31	2.25	0	0	0	0	2.87	4.31	10.8	21.6	5.96	0	0	0	0
TERN_20200729Cherokee42C4 3secs.dbc.h5	Cherokee 1	42	Light	2020-07-29	12:07:00		1.12	0	0.0709	0	6.68	0.455	0	5.53	0.61	28.8	0	0.0889	3.38	0	0	0	4.49	6.06	0	0	0	26.9	0	3.68	0	314	0.695	0	16.4	0	0
TERN_20200731Cherokee30C1 3secs.dbc.h5	Cherokee 1	30	Light	2020-07-29	17:01:00		0.121	0	0	0	0.977	0.0909	0	0.812	0.961	0	0	0	0	0	0	0	0.808	0.904	0	0	0	0	0	0	0	2.08	0	0	0	0	0
TERN_20200731Cherokee30C2 3secs.dbc.h5	Cherokee 1	30	Light	2020-07-29	19:46:00		0.105	0	0	0	1.65	0.0962	0	0.632	0.47	0.131	0	0	7.33	0	0	0	0.504	1.1	0	0	0	0	3.21	1.95	8.65	3.63	8.79	0	0	0	0
TERN_20200731Cherokee30C3 3secs.dbc.h5	Cherokee 1	30	Light	2020-07-30	18:39:00		0.547	0	0	0	3.12	0.3	0	1.18	0.526	2.2	0	0	7.51	0	0	0	0.755	2.84	0	0	0	0	0	0	0	8.23	1.2	0	0	0	0

## Sheet: Juliet 1
		Enclosure					Emission rate (pmol m-2 s-1) - measured via GC-MS
Chromatogram filename	Plant ID	temperature (°C)	Light/dark	Sampling date	Sampling time (PDT)		a-Pinene	Camphene	b-Myrcene	b-Pinene	a-Phellandrene	a-Terpinene	trans-Ocimene	Limonene	o-Cymene	b-Phellandrene	g-Terpinene	Terpinolene	a-Copaene	b-Caryophyllene	a-Humulene	MT 18.69	p-Menthatriene	2-Carene	Isoterpinolene	MT 21.75	SQT 27.57	Hexenol	SQT 28.12	SQT 28.34	SQT 28.50	TMTT	SQT 29.08	SQT 29.46	MeSA	d-Elemene	b-Elemene
TERN_20200727Juliet30C1 3secs.dbc.h5	Juliet 1	30	Light	2020-07-27	16:10:00		5.91	0.331	1.49	0.537	14.4	0.748	0	5.6	3.93	19.3	0	0	0	0	0	0	2.82	4.35	0	0	0	0	0	0	0	0	0	0	0	0	0
TERN_20200727Juliet30C2 3secs.dbc.h5	Juliet 1	30	Light	2020-07-27	18:10:00		16.9	1.78	1.49	1.1	32.7	6.1	0	9.97	12.7	18.2	0.441	0.421	0	0	0	0	3.97	7.09	0	0	0	0	0	0	0	0	0	0	0	0	0
TERN_20200728Juliet30C1 3secs.dbc.h5	Juliet 1	30	Light	2020-07-27	19:51:00		2.73	0.224	0.752	0.116	9.09	0.599	0	3.13	1.96	6.77	0.0557	0	0	0	0	0	1.38	6.11	0	0	0	0	0	0	0	0	0	0	0	0	0
TERN_20200728Juliet30C2 3secs.dbc.h5	Juliet 1	30	Dark	2020-07-27	23:33:00		2.57	0	0.06	0.512	1.39	0	0	1.09	0.0744	7.93	0	0	0	0	0	0	0.734	3.36	0	0	0	0	0	0	0	73.3	0	0	0	0	0
TERN_20200728Juliet30C3 3secs.dbc.h5	Juliet 1	30	Light	2020-07-28	11:43:00		4.7	0.785	2.25	0.138	18.3	8.76	0	5.77	4.92	5.88	0.385	0.276	8.26	0	0.261	0	2.79	10.4	0	0	2.34	0	27.4	29.4	82.4	35.4	57.9	0	0	0	0
TERN_20200728Juliet42C1 3secs.dbc.h5	Juliet 1	42	Light	2020-07-28	15:05:00		6.44	0.201	2.39	1.09	14	0.765	0.651	5.6	1.1	28.9	0	0	28.9	0	0.344	0	3.31	10.1	0	0	0.378	0	12.5	57.1	10	2650	79.1	170	359	0	0
TERN_20200728Juliet42C2 3secs.dbc.h5	Juliet 1	42	Light	2020-07-28	17:50:00		2.68	0	1.62	0.509	5.04	0	0.391	3.14	0.958	12.5	0	0	17.2	0	0.0818	0	1.51	2.68	0	0	0	0	4.59	15.6	0	2190	12	66	158	0	0
TERN_20200729Juliet30C1 3secs.dbc.h5	Juliet 1	30	Light	2020-07-29	12:53:00		5.75	0.176	0.763	0.805	6.73	0.356	0	3.61	1.24	18.6	0	0	0	0	0.0616	0	2.2	7.27	0	0	0	0	0	1.51	0	141	1.56	9.12	0	0	0
TERN_20200729Juliet42C1 3secs.dbc.h5	Juliet 1	42	Light	2020-07-28	19:38:00		2.16	0	1.72	0.272	9.59	0.207	4.28	3.17	0.95	8.55	0	0	11.5	0	0.179	0	1.8	3.29	0	0	0	0	11.1	27	24.3	720	39.3	17.4	13.9	0	0
TERN_20200729Juliet42C2 3secs.dbc.h5	Juliet 1	42	Dark	2020-07-29	01:10:00		1.25	0	0.582	0.152	4.29	0.419	0	1.69	0.498	6.01	0	0	0	0	0	0	0.995	2.31	0	0	0	0	0	8.18	0	118	6.03	13.9	0	0	0
TERN_20200729Juliet42C3 3secs.dbc.h5	Juliet 1	42	Light	2020-07-29	09:55:00		1.4	0.837	1.59	0.139	5.39	0	0.226	2.98	1.72	10.8	0	0	0	0	0	0	1.69	3.68	0	0	0	0	0	3.06	0	278	0	4.84	0	0	0
TERN_20200729Juliet42C4 3secs.dbc.h5	Juliet 1	42	Light	2020-07-29	12:07:00		1.83	0.0923	1.63	0.17	10.9	2.97	0	3.64	2.24	5.77	0	0	0.697	0	0	0	2.21	3.39	0	0	0.458	0	8.12	15	28.7	52.4	25.4	0	0	0	0
TERN_20200731Juliet30C1 3secs.dbc.h5	Juliet 1	30	Light	2020-07-29	17:01:00		1.01	0.0463	0.959	0	2.94	0	0	1.54	0.634	5.26	0	0	9.34	0	0	0	0.924	1.07	0	0	0	0	5.02	12.3	9.13	34.8	15.9	0	0	0	0
TERN_20200731Juliet30C2 3secs.dbc.h5	Juliet 1	30	Light	2020-07-29	19:46:00		0.634	0.127	0.599	0	2.35	0.369	0	1.08	0.805	1.18	0	0	3.21	0	0	0	0.467	0.78	0	0	0	0	5.02	4.44	13.5	4.37	8.65	0	0	0	0
TERN_20200731Juliet30C3 3secs.dbc.h5	Juliet 1	30	Light	2020-07-30	18:39:00		1.01	0	1.16	0	4.4	0	0	1.76	0.523	5.97	0	0	2.94	0	0	0	0.723	2.32	0	0	0	0	5.27	26	0	442	24	53.8	182	0	0

## Sheet: Early Girl 1
		Enclosure					Emission rate (pmol m-2 s-1) - measured via GC-MS
Chromatogram filename	Plant ID	temperature (°C)	Light/dark	Sampling date	Sampling time (PDT)		a-Pinene	Camphene	b-Myrcene	b-Pinene	a-Phellandrene	a-Terpinene	trans-Ocimene	Limonene	o-Cymene	b-Phellandrene	g-Terpinene	Terpinolene	a-Copaene	b-Caryophyllene	a-Humulene	MT 18.69	p-Menthatriene	2-Carene	Isoterpinolene	MT 21.75	SQT 27.57	Hexenol	SQT 28.12	SQT 28.34	SQT 28.50	TMTT	SQT 29.08	SQT 29.46	MeSA	d-Elemene	b-Elemene
TERN_20200801EarlyGirl30C1 3secs.dbc.h5	Early Girl 1	30	Light	2020-07-31	17:44:00		1.95	0	2.18	0.191	3.38	0.0891	0	5.25	1.44	35.9	0	0	0	4.65	1.14	0	1.71	10.5	0	0	0	0	0	0	0	16	0	0	0	0	0
TERN_20200801EarlyGirl30C2 3secs.dbc.h5	Early Girl 1	30	Light	2020-07-31	19:35:00		0.534	0.0948	1.33	0	7.89	1.19	0	2.45	1.84	5.89	0	0	0	0	0	0	0.783	2.53	0	0	0	0	0	0	0	0	0	0	0	0	0
TERN_20200802EarlyGirl30C1 3secs.dbc.h5	Early Girl 1	30	Dark	2020-07-31	22:49:00		0.405	0	0.671	0	5.12	0	0	1.34	0.701	2.75	0	0	0	0	0	0	0.573	3.74	0	0	0	0	0	2.79	2.91	12.7	5.98	0	0	0	0
TERN_20200802EarlyGirl30C2 3secs.dbc.h5	Early Girl 1	30	Light	2020-08-01	14:50:00		1.5	0	5.62	0	7.93	0.49	1.01	5.82	0.287	51.3	0	0	25.8	6.17	1.18	0	2.27	13.5	0	3.81	0	0	1.8	10.7	0	9190	0	44.8	2120	0	0
TERN_20200802EarlyGirl30C3 3secs.dbc.h5	Early Girl 1	30	Light	2020-08-01	19:45:00		1.06	0	4.32	0.305	11	0.626	0.617	3.72	0.655	20.5	0	0	24.2	0.602	1.47	0	1.35	7.41	0	0	1.69	0	47.6	291	42	4970	649	1510	4050	0	0
TERN_20200802EarlyGirl30C4 3secs.dbc.h5	Early Girl 1	30	Light	2020-08-02	12:57:00		9.74	0	46.7	2.16	35.3	1.8	3.37	54.3	3.31	510	0.629	0.869	9.43	2.72	0.508	0	22.1	120	0	0	0	545	7.65	19.6	0	8630	8.71	34.6	3160	0	0
TERN_20200803EarlyGirl42C1 3secs.dbc.h5	Early Girl 1	42	Light	2020-08-02	14:43:00		29.8	0.839	94	4.65	897	240	5.46	162	46.5	741	4.1	4.89	1.79	1.4	1.73	0.734	57.7	353	3.35	1.87	5.67	1090	59.8	195	273	1560	510	195	465	0	0
TERN_20200803EarlyGirl42C2 3secs.dbc.h5	Early Girl 1	42	Light	2020-08-02	17:53:00		19.9	1.85	43.2	2.49	417	108	0	76.3	65.7	200	2.1	2.13	0	0	1.03	0.604	23.9	117	1.91	0	3.98	63.9	51.7	145	198	325	254	81.8	55.3	0	0
TERN_20200803EarlyGirl42C3 3secs.dbc.h5	Early Girl 1	42	Light	2020-08-02	19:35:00		20.9	0.182	33.7	2.44	211	26.3	1.74	57	15.9	399	0.907	0.994	0	0	0.736	0	18.3	122	0	0	1.4	74	22.4	77.5	45.9	1020	132	158	43.6	0	0
TERN_20200814EarlyGirl30C1 3secs.dbc.h5	Early Girl 1	30	Light	2020-08-03	15:28:00		15.3	0.0459	10.4	0.524	35.2	4.18	1.11	45.3	4.64	328	0.606	0.98	1.02	1.97	0.556	0.125	16.8	116	1.57	0.162	0.328	101	0	0	0	1290	0	2.29	232	0	0
TERN_20200814EarlyGirl30C2 3secs.dbc.h5	Early Girl 1	30	Light	2020-08-03	19:32:00		5	0.507	3.6	0.152	16.8	1.05	0.354	11.3	6.63	62.7	0.0923	0.107	12	0.172	0.113	0.0619	3.91	31.3	0.995	0	0.398	23.6	0	1.22	0	290	0.396	4.01	76.9	0	0
TERN_20200814EarlyGirl30C3 3secs.dbc.h5	Early Girl 1	30	Dark	2020-08-04	00:23:00		3.23	0.183	2.56	0.0319	20.3	2.1	0.0934	7.43	4.22	26.7	0.0895	0.0552	19.1	0.302	0.143	0.518	2.48	22	0.919	0	0.74	12	1.14	4.89	2.8	57.9	3.98	5.9	60.6	0	0
TERN_20200814EarlyGirl30C4 3secs.dbc.h5	Early Girl 1	30	Light	2020-08-04	11:51:00		4.87	0.541	5.02	0.0489	42.3	9.88	0.423	15.9	40.1	13.4	0.688	0.785	4.77	0	0.0175	0.0672	4.11	29.4	1.12	0	0.179	1.23	1.86	3.74	5.43	3.77	2.13	0	2.96	0	0
TERN_20200814EarlyGirl42C1 3secs.dbc.h5	Early Girl 1	42	Dark	2020-08-02	23:46:00		9.13	0.828	13	0	105	29.9	0.399	29.6	58.9	36.5	1.21	1.07	0	0	0.26	0.0508	11.2	52.9	1.49	0	0.45	3.37	4.09	4.4	11.9	14.7	4.37	0	10.9	0	0
TERN_20200814EarlyGirl42C2 3secs.dbc.h5	Early Girl 1	42	Light	2020-08-03	12:33:00		22.6	0.3	15.6	0.766	180	23.4	0.56	67.5	21.5	310	1.25	1.52	0.474	2.72	0.94	0.0834	20.8	155	0.351	0.811	0.171	76.3	3.74	16.1	7.31	198	25.2	31.8	31.1	0	0

## Sheet: Roma 1
		Enclosure					Emission rate (pmol m-2 s-1) - measured via GC-MS
Chromatogram filename	Plant ID	temperature (°C)	Light/dark	Sampling date	Sampling time (PDT)		a-Pinene	Camphene	b-Myrcene	b-Pinene	a-Phellandrene	a-Terpinene	trans-Ocimene	Limonene	o-Cymene	b-Phellandrene	g-Terpinene	Terpinolene	a-Copaene	b-Caryophyllene	a-Humulene	MT 18.69	p-Menthatriene	2-Carene	Isoterpinolene	MT 21.75	SQT 27.57	Hexenol	SQT 28.12	SQT 28.34	SQT 28.50	TMTT	SQT 29.08	SQT 29.46	MeSA	d-Elemene	b-Elemene
TERN_20200801Roma30C1 3secs.dbc.h5	Roma 1	30	Light	2020-07-31	17:44:00		0.472	0.0499	0.986	0.0481	5.4	0.413	0	1.44	0.833	4	0	0	0	0	0	0	0.778	3.74	0	0	0	0	0	0	0	0	0	0	0	0	0
TERN_20200801Roma30C2 3secs.dbc.h5	Roma 1	30	Light	2020-07-31	19:35:00		0.0196	0.104	0.252	0	1.16	0	0	0.775	1.04	0.418	0	0	0	0	0	0	0.428	1.39	0	0	0	0	0	0	0	0	0	0	0	0	0
TERN_20200801Roma30C3 3secs.dbc.h5	Roma 1	30	Dark	2020-07-31	22:49:00		0	0	0	0	0.655	0	0	0.406	0.175	1.65	0	0	0	0	0	0	0.363	1.54	0	0	0	0	0	0	0	3.99	0	0	0	0	0
TERN_20200802Roma30C1 3secs.dbc.h5	Roma 1	30	Light	2020-08-01	14:50:00		0.445	0	1.68	0.0898	2.21	0.133	0	2.4	0.22	19	0	0	29.1	1.15	0	0	1.52	6.38	0	0	0	0	0	0	0	173	0	0	25.8	0	0
TERN_20200802Roma30C2 3secs.dbc.h5	Roma 1	30	Light	2020-08-01	19:45:00		0.809	0	1.59	0.137	2.58	0	0	2.45	0.66	17.7	0	0	32.1	1.69	0.311	0	1.44	5.78	0	0	0	0	0	0	0	159	0	0	75	0	0
TERN_20200802Roma30C3 3secs.dbc.h5	Roma 1	30	Light	2020-08-02	12:57:00		1.46	0.274	1.49	0	14.2	2.86	0	3.75	3.52	5.3	0.0923	0.0768	8.94	0	0	0	1.62	8.46	0	0	0.542	0	12	12.7	23.6	10.8	25.7	0	0	0	0
TERN_20200803Roma42C1 3secs.dbc.h5	Roma 1	42	Light	2020-08-02	14:43:00		7.83	0.506	15.5	0.595	178	63.5	0	33.2	26.6	74.3	1.81	1.75	10.4	0	0.298	0.486	20.4	70.6	1.43	0.335	1.85	0	18.6	23.5	67.3	164	53.5	0	2.57	0	0
TERN_20200803Roma42C2 3secs.dbc.h5	Roma 1	42	Light	2020-08-02	17:53:00		0.493	0.428	1.64	0	3.76	1.24	0	4.57	15.6	1.58	0.368	0.62	0	0	0	0	1.95	1.72	0	0	0	2.32	1.06	0	1.51	4.91	0	0	0	0	0
TERN_20200803Roma42C3 3secs.dbc.h5	Roma 1	42	Light	2020-08-02	19:35:00		1.24	0	2.95	0.144	13.8	1.6	0	5.58	5.17	12.7	0	0	4.84	0	0	0	2.03	0.978	0	0	0	0	3.05	6.62	8.28	14	7.01	0	0	0	0
TERN_20200803Roma42C4 3secs.dbc.h5	Roma 1	42	Dark	2020-08-02	23:46:00		1.36	0	2.31	0.113	12.7	0.9	0	4.72	1.52	26.1	0	0	0	0	0	0	2.65	10.7	0	0	0	0	0	1	0	17.6	1.12	0	9.26	0	0
TERN_20200814Roma30C1 3secs.dbc.h5	Roma 1	30	Light	2020-08-03	15:28:00		2.14	0.0799	1.22	0.0295	16.1	1.24	0.381	5.59	3.06	30.9	0.0379	0.045	1.9	0	0.0108	0.106	2.66	11.1	0.0945	0	0.0928	23.9	0.656	1.9	1.57	12.2	2.04	0.779	1.75	0	0
TERN_20200814Roma30C2 3secs.dbc.h5	Roma 1	30	Light	2020-08-03	19:32:00		1.47	0.192	0.861	0.00653	12.5	1.35	0.145	4.16	5.62	8.16	0.0959	0.0983	5.45	0	0	0.171	1.71	8.45	0.056	0	0	0.903	1.29	0.935	0.914	2.07	0.423	0	1.57	0	0
TERN_20200814Roma30C3 3secs.dbc.h5	Roma 1	30	Dark	2020-08-04	00:23:00		0.677	0.0707	0.206	0	3.65	0.326	0	1.81	2.26	2.03	0	0	20.1	0	0.0323	0.028	0.482	3.81	0	0	0.178	0.108	0.741	0.499	0	4.38	0.203	0	5.98	0	0
TERN_20200814Roma30C4 3secs.dbc.h5	Roma 1	30	Light	2020-08-04	11:51:00		1.5	0.0868	1.66	0.0681	4.72	0.181	0.196	3.8	1.87	9.9	0.00998	0.0152	63.5	0.272	0.135	0.234	0.933	5.51	0.958	0	0.389	0.305	1.51	2.56	0.826	14.4	0.892	0.642	12.5	0	0
TERN_20200814Roma42C1 3secs.dbc.h5	Roma 1	42	Light	2020-08-03	12:33:00		4.16	0.0658	3.75	0.149	19.8	1.37	0.21	14	4.31	59.2	0.111	0.21	2.22	0.184	0.0684	0.122	6.35	26	0	0	0.0996	24.4	0	1.42	0.204	48.8	0.768	2.54	7.21	0	0

## Sheet: Summer Set 1
		Enclosure					Emission rate (pmol m-2 s-1) - measured via GC-MS
Chromatogram filename	Plant ID	temperature (°C)	Light/dark	Sampling date	Sampling time (PDT)		a-Pinene	Camphene	b-Myrcene	b-Pinene	a-Phellandrene	a-Terpinene	trans-Ocimene	Limonene	o-Cymene	b-Phellandrene	g-Terpinene	Terpinolene	a-Copaene	b-Caryophyllene	a-Humulene	MT 18.69	p-Menthatriene	2-Carene	Isoterpinolene	MT 21.75	SQT 27.57	Hexenol	SQT 28.12	SQT 28.34	SQT 28.50	TMTT	SQT 29.08	SQT 29.46	MeSA	d-Elemene	b-Elemene
TERN_20200801SummerSet30C1 3secs.dbc.h5	Summer Set 1	30	Light	2020-07-31	17:44:00		0.835	0	0.949	0	8.83	1.27	0	2.43	1.69	4.49	0	0	0	0	0.22	0	1.52	5.89	0	0	0	0	0	0	0	0	0	0	0	0	0
TERN_20200801SummerSet30C2 3secs.dbc.h5	Summer Set 1	30	Light	2020-07-31	19:35:00		0.339	0	0.566	0	5	0.247	0	1.58	0.8	3.12	0	0	0	0	0	0	0.99	3.71	0	0	0	0	0	0	0	0	0	0	0	0	0
TERN_20200802SummerSet30C1 3secs.dbc.h5	Summer Set 1	30	Dark	2020-07-31	22:49:00		2.78	0.0999	1.38	0.0617	15.4	1.35	0	3.8	0.82	19.9	0	0	0	8.84	2.16	0	3.14	15.4	0	0	0	0	0	0	0	0	0	0	0	0	0
TERN_20200802SummerSet30C2 3secs.dbc.h5	Summer Set 1	30	Light	2020-08-01	14:50:00		0.165	0	1.36	0	1.3	0	0	1.76	0.135	13.9	0	0	12.1	0	0	0	1.19	3.67	0	0	0	0	0	0	0	231	0	0	0	0	0
TERN_20200802SummerSet30C3 3secs.dbc.h5	Summer Set 1	30	Light	2020-08-01	19:45:00		0.0764	0	0	0	2.34	0	0	1.01	0.613	2.05	0	0	3.24	0	0	0	0.768	1.94	0	0	0	0	1.66	0	2.49	6.1	9.39	0	0	0	0
TERN_20200802SummerSet30C4 3secs.dbc.h5	Summer Set 1	30	Light	2020-08-02	12:57:00		2.77	0.181	2.99	0	33.7	4.38	0	6.89	2.36	32.6	0	0	3.28	4.91	1.42	0	5.76	23.2	0	0	0.938	0	5.39	21.4	0	323	20.9	51.8	0	0	0
TERN_20200803SummerSet42C1 3secs.dbc.h5	Summer Set 1	42	Light	2020-08-02	14:43:00		5.73	0	12.6	0.654	115	22.3	0	25.3	11.1	84.2	0.597	0.903	1.97	1.06	0.548	0	23.3	44	0.585	0	0.733	18	14.6	31.1	45.7	95.2	42.9	5.82	3.85	0	0
TERN_20200803SummerSet42C2 3secs.dbc.h5	Summer Set 1	42	Light	2020-08-02	17:53:00		1.65	0.263	4.7	0.137	36.3	9.58	0	9.77	10.8	12.9	0.414	0.472	0	0	0	0	6.8	10.1	0	0	0	1.29	3.39	0	11.3	15.6	4.86	0	0	0	0
TERN_20200803SummerSet42C3 3secs.dbc.h5	Summer Set 1	42	Light	2020-08-02	19:35:00		1.84	0.0779	4.92	0.266	24.9	1.42	0	9.01	6.17	29.9	0	0	0	0	0	0	6.01	7.63	0	0	0	3.37	0	0	0	6.04	0	0	0	0	0
TERN_20200804SummerSet42C1 3secs.dbc.h5	Summer Set 1	42	Dark	2020-08-02	23:46:00		2.98	0	3.42	0.302	13.2	1.12	0	8.13	1.36	61.6	0	0	0	1.07	0.427	0	8.26	24.1	0	0	0	0	0	0	0	100	0	0	0	0	0
TERN_20200814SummerSet30C1 3secs.dbc.h5	Summer Set 1	30	Light	2020-08-03	15:28:00		2.96	0.241	2.2	0	35.8	3.95	0.464	10.5	9.06	34.6	0.174	0.195	2.45	0	0.0857	0.389	7.8	22.7	0	0	0.92	33.7	1.1	2.66	2.64	14.4	3.22	0.791	22.8	0	0
TERN_20200814SummerSet30C2 3secs.dbc.h5	Summer Set 1	30	Light	2020-08-03	19:32:00		1.69	0.182	1.4	0	4	0.282	0.322	5.42	1.55	39.3	0.0239	0	101	2.24	0.278	0.776	3.79	13.3	1.43	0	1.59	33.8	0	0	0	185	0	0	118	0	0
TERN_20200814SummerSet30C3 3secs.dbc.h5	Summer Set 1	30	Dark	2020-08-04	00:23:00		0.958	0.188	0.488	0.0168	4.63	0.225	0.054	2.58	2.52	5.66	0	0	102	0.581	0.182	0.415	1.76	6.51	0.76	0	0.828	7.39	0.857	0	0	17.2	0	0	51.4	0	0
TERN_20200814SummerSet30C4 3secs.dbc.h5	Summer Set 1	30	Light	2020-08-04	11:51:00		1.36	0.218	0.963	0.0475	8.73	0.376	0.0556	3.44	3.38	8.01	0	0	198	0.934	0.488	0.225	1.86	7.4	0.812	0	0.695	7.81	7.42	2.53	0	4.95	0	0	9.89	0	0
TERN_20200814SummerSet42C1 3secs.dbc.h5	Summer Set 1	42	Light	2020-08-03	12:33:00		5.76	0.179	7.04	0.207	57.8	5.48	0.249	26.8	13	108	0.225	0.298	0.456	0	0.191	0	24.5	41.4	0.528	0	0.528	25.2	0.186	1.71	0	23.7	1.12	2.01	19.3	0	0

## Sheet: Beefsteak 2
		Enclosure					Emission rate (pmol m-2 s-1) - measured via GC-MS
Chromatogram filename	Plant ID	temperature (°C)	Light/dark	Sampling date	Sampling time (PDT)		a-Pinene	Camphene	b-Myrcene	b-Pinene	a-Phellandrene	a-Terpinene	trans-Ocimene	Limonene	o-Cymene	b-Phellandrene	g-Terpinene	Terpinolene	a-Copaene	b-Caryophyllene	a-Humulene	MT 18.69	p-Menthatriene	2-Carene	Isoterpinolene	MT 21.75	SQT 27.57	Hexenol	SQT 28.12	SQT 28.34	SQT 28.50	TMTT	SQT 29.08	SQT 29.46	MeSA	d-Elemene	b-Elemene
TERN_20200816Beefsteak230C1 3secs.dbc.h5	Beefsteak 2	30	Light	2020-08-15	15:05:00		3.26	0.205	1.8	0.0652	21.1	2.61	0	9.04	5.88	27.8	0.164	0.0871	0	3.16	1.07	0	3.41	20	0	0	0	0	0	0.814	0	26.7	0.467	0	16.8	0	0
TERN_20200816Beefsteak230C2 3secs.dbc.h5	Beefsteak 2	30	Light	2020-08-15	17:33:00		1.56	1.17	0.783	0	1.54	2.29	0	8.27	48	1.78	0.446	0.583	0	0	0	0	3.04	20.8	0.401	0	0	0	0	0	0	0	0	0	0.52	0	0
TERN_20200816Beefsteak230C3 3secs.dbc.h5	Beefsteak 2	30	Light	2020-08-15	19:28:00		1.81	0.201	1.24	0	3.41	0.127	0	4.2	4.2	12.1	0	0	0	0	0.15	0	1.72	8.56	0	0	0	0	0	0	0	16.5	0	0	13.3	0	0
TERN_20200816Beefsteak230C4Rerun 3secs.dbc.h5	Beefsteak 2	30	Dark	2020-08-15	22:35:00		1.93	0.056	1.16	0.0649	1.07	0.0979	0	4.88	1.28	18.9	0	0	0	0	0.0799	0	1.97	10.7	0	0	0	0	0	0	0	43.4	0	0	40.6	0	0
TERN_20200817Beefsteak230C1 3secs.dbc.h5	Beefsteak 2	30	Light	2020-08-16	11:39:00		1.91	0.081	1.42	0.0455	4.84	0.357	0	4.91	1.99	15.8	0	0	0	0	0.144	0	1.76	11.5	0	0	0	0	0	1.47	0	34.9	1.37	1.81	5.91	0	0
TERN_20200817Beefsteak242C1 3secs.dbc.h5	Beefsteak 2	42	Light	2020-08-16	13:02:00		12.9	1.1	13.5	0.229	181	55	0	61.1	84.2	87.3	2.04	2.35	0	1.11	0.817	0.301	31.2	93	1.84	0.284	0.634	0.362	5.65	17	19.2	60.9	22.6	9.52	19.6	0	0
TERN_20200817Beefsteak242C2 3secs.dbc.h5	Beefsteak 2	42	Light	2020-08-16	14:41:00		4.55	1.53	3.98	0	34.9	66.3	0	23	63.2	9.52	4.31	3.47	0	0	0	1.23	13.4	42.7	9.06	0.41	0	0	0	0	0.949	4.96	0	0	3.06	0	0
TERN_20200817Beefsteak242C3 3secs.dbc.h5	Beefsteak 2	42	Light	2020-08-16	17:03:00		6.02	0.371	4.84	0.113	44.6	3.53	0	19.4	14.2	55.5	0.218	0.0885	0	0.781	0.472	0	10.2	41.6	0	0	0	0	0	0	0	16.7	0	0	5.46	0	0
TERN_20200817Beefsteak242C4 3secs.dbc.h5	Beefsteak 2	42	Light	2020-08-16	19:45:00		5.12	0.211	4.08	0.171	20.4	1.85	0	15.2	4.67	63.1	0.21	0.264	0	0.672	0.351	0	7.63	36.3	0	0	0	0	0	0	0	9.7	0	0	5.33	0	0
TERN_20200817Beefsteak242C5 3secs.dbc.h5	Beefsteak 2	42	Dark	2020-08-16	23:23:00		5.18	0.398	2.73	0.0336	44.8	4.6	0	17.9	22.3	28.3	0.328	0.313	0	0	0.181	0	7.9	35.5	0	0	0	0	0	0	0	3.6	0	0	0.727	0	0
TERN_20200817Beefsteak242C6 3secs.dbc.h5	Beefsteak 2	42	Light	2020-08-17	12:05:00		6.79	1.85	4.34	0	74.2	29.2	0	36.9	103	26.5	1.88	1.72	0	0	0.123	0.737	18	69.4	3.2	0	0	0	0	0	0	5.11	0	0	1.45	0	0

[truncated: 8 more sheets: Black Cherry 1, Husky Cherry 1, Roma HS1, Roma HS2, Roma HS3, Roma C1, Roma C2, Roma C3]
